# Supplementary material for: The Lipid Raft Proteome of African Trypanosomes Contains Many Flagellar Proteins
Source: Pathogens. 2017 Aug 24;6(3):39. doi: 10.3390/pathogens6030039 (PMC5617996; doi:10.3390/pathogens6030039)
Supplement: Supplementary file 1 [file pathogens-06-00039-s001.xlsx]

## Sheet: Tb PF Lipid Raft Proteome
The Trypanosoma brucei Procyclic Form Lipid Raft Proteome
Accession Number	Average Number of Peptides in the Proteome	Subota et al. 2014 Flagellar proteome?	Description	MW kDa	Alternative name	published localization	References (PMID)	Remarks
Tb927.1.1240	4	Yes	CTP synthase	65.1707	CTP synthase	none shown	17331943, 11353848
Tb927.1.2100	15	Yes	Calpain-like protein 1.1	126.077	TbCalp1.1	none shown	19766148
Tb927.1.2330	19	Yes	Beta tubulin	49.6717	beta tubulin	cytoskeletal
Tb927.1.2340	20	Yes	Alpha tubulin	49.7555	alpha tubulin	cytoskeletal
Tb927.1.2670	2	Yes	Paralyzed flagella 16	56.0914	PF16	single microtubule of the central apparatus	10684790, 16607017, 16882690, 8636214	Axoneme central apparatus protein (PF16)
Tb927.1.3310	2	Yes	Hypothetical protein	28.4855	hypothetical protein	none
Tb927.1.3950	3	Yes	Alanine aminotransferase	63.0973	TbAAT	cytoplasm	6245876, 19895576
Tb927.1.4100	2	Yes	cytochrome oxidase subunit IV	40.5092	COXIV	mitochondrial tube, kinetoplast	12467979
Tb927.10.10280	9	Yes	Microtubule-associated protein, putative	254.488	BBP268	basal body	28049148
Tb927.10.1060	5	Yes	T-complex protein 1 subunit delta	58.3245	TCP-1-delta	none
Tb927.10.1100	3	Yes	60S ribosomal protein L9, putative	21.8438	60S ribosomal protein L9	none
Tb927.10.11220	3	Yes	procyclic form surface phosphoprotein	46.0112	PSSA2	membrane surface	19759911
Tb927.10.11390	4	Yes	60S ribosomal protein L6, putative	21.1717	60S ribosomal protein L6	none	16020724
Tb927.10.11970	6	Yes	Kynurenine aminotransferase, putative	48.3038	glutamine aminotransferase	none	16302277
Tb927.10.12260	6	Yes	Cytosolic nonspecific dipeptidase, putative	51.546	cytosolic nonspecific dipeptidase, putative	none
Tb927.10.12710	16	Yes	Heat shock protein, putative	90.8071	HSP110	none
Tb927.10.12890	6	Yes	Prolyl-trna synthetase, putative	90.903	bifunctional aminoacyl-tRNA synthetase, putative	none
Tb927.10.13780	1	Yes	Glycogen synthase kinase 3, lapatinib-binding protein kinase	40.2947	GSK3 TbLBPK4	none	23437089	drug target
Tb927.10.14600	2	Yes	40S ribosomal protein S2, putative	28.624	RPS2	none
Tb927.10.14820	2	Yes	Mitochondrial carrier protein, putative	34.0525	MCP5c	mitochondrion	23074217
Tb927.10.14980	2	Yes	intraflagellar transport protein 52	72.3325	IFT52	basal body and proximal flagellum	18094047, 20923419
Tb927.10.1500	5	Yes	Methionyl-tRNA synthetase, putative	86.8565	MetRS	none
Tb927.10.15250	3	Yes	paraflagellar rod component, putative	57.7767	PFC15	PFR	19074134
Tb927.10.15410	5	Yes	Glycosomal malate dehydrogenase	33.6891	gMDH	glycosomal and mitochondrial	24792668, 16321390
Tb927.10.15760	5	Yes	Putative uncharacterized protein	36.3889	hypothetical protein	flagellum not published		Localizes to flagellum Ziyin Li, , University of Texas Medical School at Houston
Tb927.10.16100	2	Yes	Peptidylprolyl isomerase-like protein, putative	47.575	FK506-BP (FKBP)	none
Tb927.10.180	3	Yes	ATP synthase F1 subunit gamma protein, putative	34.3486	ATPF1G	point mutations	23959897, 24550326	drug resisitance
Tb927.10.190	2	Yes	40S ribosomal protein S6	28.4228	40S ribosomal protein S6	none	26784394
Tb927.10.2020	19	Yes	Hexokinase	51.1164	HK2	glycosomal and flagellar depends on LCS	22619756
Tb927.10.2100	12	Yes	Elongation factor 1-alpha 1	49.0746	TEF1	cytosol	18499667, 22860115
Tb927.10.2190	1	Yes	Protein of unknown function (DUF667), putative	34.531	DUF667	none
Tb927.10.230	1	Yes	Proteasome subunit alpha type	27.1597	proteasome subunit alpha type-5	none
Tb927.10.2350	1	Yes	Dihydrolipoamide acetyltransferase, putative new pyruvate dehydrogenase complex E3 binding protein, putative	27.3179	pyruvate dehydrogenase	none
Tb927.10.2560	7	Yes	Malate dehydrogenase	33.1675	mMDH	none
Tb927.10.2620	2	Yes	CS domain containing protein, putative	21.7953	CS domain containing protein	none
Tb927.10.2640	3	Yes	intraflagellar transport protein 81	84.5934	IFT81	flagellum including BB	20923419, 23990561
Tb927.10.2890	17	Yes	Enolase	46.5627	enolase	cytoplasm	12869196
Tb927.10.3210	8	Yes	Delta-1-pyrroline-5-carboxylate dehydrogenase, putative	61.9972	delta-1-pyrroline-5-carboxylate dehydrogenase	none
Tb927.10.3260	7	Yes	Fatty acyl CoA synthetase, putative	78.9333	EC 6.2.1.3	none	11685899, 15287596
Tb927.10.3710	2	Yes	Proteasome activator protein PA26	25.2421	pa26	cytoplasm	11854272
Tb927.10.3940	5	Yes	40S ribosomal protein S3a	29.4038	40S ribosomal protein S3A	none
Tb927.10.4560	2	Yes	Elongation factor 2	94.2737	elongation factor	none
Tb927.10.4980	2	Yes	Ubiquitin-like protein DSK2, putative	32.1658	DSK2	none
Tb927.10.5770	8	Yes	Valosin-containing protein homolog	85.7718	VCP	none
Tb927.10.5810	2	Yes	Putative uncharacterized protein	48.2276	BART	cytoplasm, flagellum	22278056	The ARF-like 2 binding protein BART, putative
Tb927.10.5840	2	Yes	Translation elongation factor 1-beta, putative	21.9453	1-beta	none
Tb927.10.5940	4	Yes	NEK family serine/threonine-preotein kinase	54.7142	Serine/threonine-protein kinase	none	26187993	NEK family Serine/threonine-protein kinase, putative
Tb927.10.6400	19	Yes	Chaperonin Hsp60, mitochondrial	59.4659	HSP60	mitochondrion in cruzi		Sullivan paper
Tb927.10.6880	4	Yes	Glyceraldehyde-3-phosphate dehydrogenase	35.5885	cGAPDH	cytoplasm	2040303
Tb927.10.7410	5	Yes	Succinyl-CoA ligase subunit beta	54.7724	GDP-forming	none
Tb927.10.7500	1	Yes	Fibrillarin	31.6233	NOP1	none
Tb927.10.7700	6	Yes	ABC transporter, putative	75.0033	ABCG	none
Tb927.10.7930	8	Yes	2,3-bisphosphoglycerate-independent phosphoglycerate mutase	60.5655	PGAM	none	10691985
Tb927.10.8020	14	Yes	Prolyl oligopeptidase, putative	77.5771	POP	none	20188209	Tc80, hydoylizes collagen
Tb927.10.8030	3	Yes	Putative uncharacterized protein	28.816	mitochondrial F0F1 ATP synthase	none	19436713
Tb927.10.8190	8	Yes	T-complex protein 1, theta subunit, putative	58.045	T-complex protein 1	none
Tb927.10.8230	8	Yes	Protein disulfide isomerase	55.545	PDI2	none
Tb927.10.8940	9	Yes	flagellum targeting protein kharon1, putative	45.3709	KH1	cytoplasm	23766511
Tb927.10.9190	18	Yes	Isoleucyl-tRNA synthetase, putative	130.52	IleRS	cytoplasm	20700444
Tb927.11.10060	1	Yes	Biotin--acetyl-CoA-carboxylase ligase, putative	26.4707	Biotin--acetyl-CoA-carboxylase ligase	cytoplasm, flagellum
Tb927.11.1020	3	Yes	Ribokinase, putative	35.2655	ribokinase	glycosome	24792668
Tb927.11.10760	6	Yes	Kinesin-like protein	69.8411	KIN-D	cell tip	22623724
Tb927.11.10770	2	Yes	VHS domain containing protein, putative	48.9132	VHS domain	none
Tb927.11.11250	3	Yes	Malate dehydrogenase	35.1291	cMDH	none	10583384
Tb927.11.11330	29	Yes	Heat shock protein 70	75.3196	HSP70	none
Tb927.11.11520	2	Yes	Glycosomal membrane protein, putative	24.0118	PEX11	glycosome	24792668
Tb927.11.12850	6	Yes	Oligopeptidase b	80.5214	OPB	cytoplasm	9024691
Tb927.11.13250	3	Yes	Eukaryotic translation initiation factor 2 gamma, putative	52.167	eIF-2-gamma	none
Tb927.11.13280	1	Yes	Guide RNA binding protein	25.0909	GBP25	none	26991453
Tb927.11.13500	11	Yes	Paraflagellar rod component, putative	68.307	Par1	PFR
Tb927.11.14250	4	Yes	T-complex protein 1, epsilon subunit, putative	59.3433	TCP-1-epsilon	none
Tb927.11.15100	3	Yes	Putative uncharacterized protein	127.847	5.20	PFR	7838181
Tb927.11.15800	3	Yes	Tip Of Extending FAZ protein 1	89.5316	TOEFAZ1	FAZ	26272611
Tb927.11.16730	7	Yes	Dihydrolipoyl dehydrogenase	50.4008	GCVL-2	cytoplasm	23125353
Tb927.11.16760	6	Yes	T-complex protein 1 subunit alpha	54.5897	TCP-1-alpha	none	19105172
Tb927.11.16970	1	Yes	Serine/threonine-protein phosphatase	34.4099	protein phosphatase 4	none	19309510
Tb927.11.17000	18	Yes	leucine-rich repeat protein (LRRP), putative	110.052	TbAIR9	cytoskeletal	19704687, PMC3488599
Tb927.11.1740	4	Yes	Intraflagellar transport protein IFT88, putative	89.6985	IFT88	none	20923419
Tb927.11.1840	4	Yes	Uncharacterized protein	45.606	hypothetical protein	none
Tb927.11.1900	9	Yes	T-complex protein 1, beta subunit, putative	58.0213	T-complex protein 1	none
Tb927.11.1980	3	Yes	zinc finger protein family member, putative	58.4236	ZC3H41	none	20444260
Tb927.11.1990	7	Yes	Arginyl-tRNA synthetase, putative	78.3827	arginyl-tRNA synthetase	none
Tb927.11.2300	2	Yes	Eukaryotic peptide chain release factor subunit 1, putative	50.945	ERF1	none
Tb927.11.2500	10	Yes	Carboxypeptidase, putative	57.6463	MCP1	none
Tb927.11.2610	9	Yes	Putative uncharacterized protein	50.8568	hypothetical protein	none
Tb927.11.2650	9	Yes	Heat shock protein, mitochondrial, putative	84.1475	HSP84	none
Tb927.11.3250	35	Yes	Dynein heavy chain, putative	530.847	DHC (ODAb)	flagellar	27519801
Tb927.11.3650	8	Yes	Adenylosuccinate synthetase	66.6329	adenylosuccinate synthetase	cytoplasm, flagellum	18242729
Tb927.11.3730	12	Yes	Leucyl-tRNA synthetase, putative	121.747	LeuRS	none
Tb927.11.3980	6	Yes	Mitochondrial processing peptidase alpha subunit, putative	57.0016	metallo-peptidase	none
Tb927.11.4700	3	Yes	Prostaglandin f synthase	30.9727	prostaglandin f synthase	none
Tb927.11.5440	7	Yes	Malic enzyme	61.4684	malic enzyme	cytoplasm, flagellum	16984
Tb927.11.5520	7	Yes	Triosephosphate isomerase	26.8021	TIM	glycosome	24792668
Tb927.11.6160	2	Yes	Eukaryotic release factor 3, putative	76.8664	ERF3	none	26784394
Tb927.11.6210	4	Yes	Lanosterol 14-alpha-demethylase	54.337	CYP51	none	20386598
Tb927.11.6280	2	Yes	Pyruvate phosphate dikinase	100.387	PPDK	glycosome	24792668
Tb927.11.6590	12	Yes	Aminopeptidase, putative	55.3241	metallo-peptidase	none
Tb927.11.6870	1	Yes	14-3-3-like protein, putative	29.1778	14-3-3 protein	Axoneme	24741115
Tb927.11.7270	1	Yes	Proteasome subunit beta type	22.4692	PSB3	none
Tb927.11.740	1	Yes	Eukaryotic translation initiation factor 5A	17.8088	EIF5A	none	23525104
Tb927.11.7560	7	Yes	Putative uncharacterized protein	67.6529	WD40	none		Predicted WD40 repeat protein
Tb927.11.9530	2	Yes	14-3-3-like protein, putative	30.2912	1433	Axoneme	24741115	Bastin Flagellar proteome
Tb927.11.9590	8	Yes	Adenosylhomocysteinase	48.4164	S-adenosylhomocysteine hydrolase	none
Tb927.11.9640	8	Yes	Glycyl-tRNA synthetase, putative	70.1314	glycyl-tRNA synthetase	none
Tb927.2.2440	4	Yes	Proteasome regulatory non-ATPase subunit 6	57.2886	RPN6	cytoplasm, flagellum	12213827
Tb927.2.2510	3	Yes	Uncharacterized protein	29.1711	VDAC1	mitochondrion	23212919, 19091722	Mitochondrial porin, voltage-dependent anion channel (VDAC) of the mitochondrial outer membrane. TbVDAC.
Tb927.2.4210	17	Yes	Glycosomal phosphoenolpyruvate carboxykinase	58.5277	PEPCK	glycosome	24792668
Tb927.2.4370	9	Yes	Trypanothione synthetase, putative	71.5678	TRYS	cytoplasm	22278056
Tb927.2.4580	1	Yes	Uncharacterized protein	22.6461	unc119	cytoplasm, flagellum	26187993	UNC119 (unc119)
Tb927.3.1010	4	Yes	Uncharacterized protein	64.3011	hypothetical protein	none
Tb927.3.1120	3	Yes	GTP-binding nuclear protein rtb2, putative	24.3903	RTB2	nuclear pore	25217630
Tb927.3.1380	12	Yes	ATP synthase subunit beta	55.741	ATP synthase	mitochondrion	15110463
Tb927.3.1790	5	Yes	Pyruvate dehydrogenase E1 beta subunit, putative	37.5417	pyruvate dehydrogenase E1 beta subunit	mitochondrion	23125353
Tb927.3.2100	6	Yes	Uncharacterized protein	33.9751	hypothetical protein	none
Tb927.3.2230	5	Yes	Succinyl-CoA synthetase alpha subunit, putative	31.4444	succinyl-CoA synthetase alpha subunit	none
Tb927.3.2310	1	Yes	Uncharacterized protein	33.7638	PACRGA	none		PACRGA
Tb927.3.2960	1	Yes	Inosine-adenosine-guanosine-nucleoside hydrolase	35.8248	IAGNH	none	18242729
Tb927.3.3190	3	Yes	Serine/threonine-protein kinase, putative	56.1171	NEK7	none	26187993
Tb927.3.3270	13	Yes	ATP-dependent 6-phosphofructokinase	53.4839	PFK	glycosome	24792668
Tb927.3.3410	3	Yes	Aspartyl aminopeptidase, putative	49.2961	aspartyl aminopeptidase	none
Tb927.3.3450	4	Yes	ADP-ribosylation factor-like protein 3A, putative	19.8683	ARL3	none	15582509
Tb927.3.3560	2	Yes	Uncharacterized protein	69.0433	U-box domain	none		U-box domain containing protein, putative
Tb927.3.3770	1	Yes	Uncharacterized protein	31.6422	PFC6	PFR	19074134	Paraflagellar rod component, putative (PFC6)
Tb927.3.3900	8	Yes	Carnitine O-palmitoyltransferase II, putative	67.3536	CPT II	cytoplasm
Tb927.3.4290	9	Yes	73 kDa paraflagellar rod protein	68.6403	PFR1	PFR	12798502
Tb927.3.4500	12	Yes	Fumarate hydratase, putative	62.2224	FHc	cytoplasm	17884972
Tb927.3.4680	3	Yes	RAB GDP dissociation inhibitor alpha, putative	49.3648	GDI	none
Tb927.3.4760	5	Yes	Dynamin, putative	73.1032	dynamin-1	none		Vacuolar protein sorting-associated protein, putative
Tb927.3.5050	2	Yes	60S ribosomal protein L4	41.8295	60S ribosomal protein L4	none	26784394
Tb927.3.5310	5	Yes	Uncharacterized protein	242.63	I2	PFR	19309510	Paraflagellar rod protein
Tb927.3.5550	1	Yes	Intraflagellar transport protein 27 homolog	20.6255	IFT27 (RABL4)	flagellar	20923419, 24843028
Tb927.3.930	27	Yes	Dynein heavy chain, putative	531.077	DHC (ODAa)	axoneme	19309510
Tb927.4.2040	1	Yes	Uncharacterized protein	20.7958	ALBA3	cytoplasm	21965287, 26784394	ALBA-Domain Protein (ALBA3)
Tb927.4.3590	7	Yes	Translation elongation factor 1-beta, putative	28.3577	translation elongation factor 1-beta	none	20700444
Tb927.4.3950	13	Yes	Cytoskeleton-associated protein CAP5.5, putative	94.594	CAP5.5	cortical cytoskeleton	11463463
Tb927.4.4040	1	Yes	Uncharacterized protein	30.2548	hypothetical protein	none
Tb927.5.1060	6	Yes	Mitochondrial processing peptidase, beta subunit, putative	54.0889	mitochondrial processing peptidase	cytoplasm	25888089
Tb927.5.1090	6	Yes	Threonyl-tRNA synthetase, putative	90.9267	threonyl-tRNA synthetase	cytoplasm	26187993
Tb927.5.1210	2	Yes	Short-chain dehydrogenase, putative	33.8548	short-chain dehydrogenase	glycosome	24792668
Tb927.5.1780	4	Yes	Uncharacterized protein	48.162	hypothetical protein	none
Tb927.5.3820	1	Yes	Aspartate carbamoyltransferase, putative	35.8877	aspartate carbamoyltransferase	none	17826337
Tb927.5.440	4	Yes	Trans sialidase, putative	84.5103	trans-sialidase	none
Tb927.5.4500	1	Yes	ADP-ribosylation factor, putative	21.7574	TbSAR1	none		Ras-like small GTPase, putative (TbSAR1)
Tb927.5.800	2	Yes	Casein kinase, putative	38.3508	CK1.2	none	23437089, 19450734
Tb927.6.1520	4	Yes	Aquaporin 3, putative	35.0434	AQP1	pellicular membrane	15138256
Tb927.6.1880	7	Yes	Aspartyl-tRNA synthetase, putative	62.9502	aspartyl-tRNA synthetase	none
Tb927.6.2740	2	Yes	Pyridoxal kinase	33.311	pdxK	none
Tb927.6.2790	7	Yes	L-threonine 3-dehydrogenase, putative	36.9337	L-threonine 3-dehydrogenase	Glycosome	23899193
Tb927.6.3090	14	Yes	Uncharacterized protein	178.961	XMAP215	Cytoskeletal	24164479	Cytoskeleton-associated protein, putative
Tb927.6.3650	4	Yes	ADP-ribosylation factor, putative	20.0592	ADP-ribosylation factor	none
Tb927.6.3740	18	Yes	Heat shock 70 kDa protein, mitochondrial, putative	71.4303	HSP70	cytoplasm	24945722
Tb927.6.4280	11	Yes	Glyceraldehyde-3-phosphate dehydrogenase	43.8414	GAPDH	glycosome	24792668
Tb927.6.4370	5	Yes	Eukaryotic translation initiation factor 3 subunit 7-like protein	57.9378	EIF3D	nucleus	25539953, 26784394
Tb927.6.4440	3	Yes	Uncharacterized protein	37.6951	RBP42	cytoplasm	26784394, 22966087	RNA-binding protein 42 (RNA-binding motif protein 42) (RBP42)
Tb927.6.5070	3	Yes	Uncharacterized protein	51.7891	hypothetical protein	none
Tb927.6.950	4	Yes	Cysteinyl-tRNA synthetase, putative	89.3206	cysteinyl-tRNA synthetase	none
Tb927.7.1300	2	Yes	Protein disulfide isomerase, putative	41.9134	protein disulfide isomerase	ER	24945722
Tb927.7.190	9	Yes	Thimet oligopeptidase A, putative	77.4242	OPA	none	20700444
Tb927.7.2640	3	Yes	Uncharacterized protein	50.8224	cytoskeleton associated protein	cytoskeletal corset	26504079, 25180513	CAP51
Tb927.7.2700	4	Yes	NADH-cytochrome b5 reductase, putative	31.836	B5R	none
Tb927.7.2980	3	Yes	Uncharacterized protein	21.2287	Nitroreductase family	cytoplasm	26784394	Nitroreductase family, putative
Tb927.7.3370	2	Yes	Uncharacterized protein	67.4439	IFT74	flagellum	20923419	Member of the IFT-B complex.
Tb927.7.3440	2	Yes	I/6 autoantigen	27.0334	I6	none
Tb927.7.3550	13	Yes	Uncharacterized protein	138.081	cytoskeleton associated protein	Cytoskeletal	17951107, 26504079
Tb927.7.4390	8	Yes	Threonine synthase, putative	73.8274	threonine synthase	none
Tb927.7.4520	4	Yes	Uncharacterized protein	22.3012	Thioredoxin-like	flagellar	24945722
Tb927.7.5000	1	Yes	60S ribosomal protein L19, putative	29.3906	60S ribosomal protein L19	cytoplasm
Tb927.7.5340	3	Yes	Uncharacterized protein	56.7875	hypothetical protein	none		gene name CARP3.
Tb927.7.5940	5	Yes	Uncharacterized protein	67.1075	PAD2	membrane	19444208	Protein Associated with Differentiation (PAD2)
Tb927.7.6850	8	Yes	Trans-sialidase	84.4907	TbTS	none
Tb927.7.710	13	Yes	Heat shock 70 kDa protein, putative	70.1684	HSP70	none
Tb927.8.1330	6	Yes	60S ribosomal protein L7a, putative	30.8603	60S ribosomal protein L7a	none
Tb927.8.1550	7	Yes	Uncharacterized protein	88.1241	PFC3	PFR	19074134	Paraflagellar rod component, putative (PFC3)
Tb927.8.1870	6	Yes	Golgi/lysosome glycoprotein 1	67.5545	GLP1	Golgi, lysosome	10462522, 22278056
Tb927.8.1990	5	Yes	Tryparedoxin peroxidase	25.6152	TRYP2	none		Peroxidoxin (TRYP2)
Tb927.8.2630	6	Yes	Kinesin-like protein	85.1376	kinesin-C	posterior tip cell cytoskeleton	22168367	required for maintenance of cell morphology
Tb927.8.3150	4	Yes	T-complex protein 1 subunit gamma	60.7786	TCP1-gamma	none
Tb927.8.3530	5	Yes	Glycerol-3-phosphate dehydrogenase [NAD(+)]	37.7807	G3PDH	glycosomal
Tb927.8.4210	3	Yes	Uncharacterized protein	46.1096	BBP46	Basal Body	28049148	just published
Tb927.8.4970	8	Yes	69 kDa paraflagellar rod protein	69.5536	PFR2	PFR	9468133	Paraflagellar rod protein A (PFR2-1)
Tb927.8.5460	2	Yes	Flagellar calcium-binding protein TB-44A	45.6898	calflagin	Flagellar	20418379	Flagellar calcium binding protein, virulence factor
Tb927.8.5600	4	Yes	Transaldolase	36.6042	transaldolase	none
Tb927.8.6110	7	Yes	Uncharacterized protein	54.6353	HMGS	cytoplasm	22186015	3-hydroxy-3-methylglutaryl-CoA synthase, putative (HMGS)
Tb927.8.6150	2	Yes	40S ribosomal protein S8	24.922	40S ribosomal protein S8	none
Tb927.8.6170	9	Yes	Transketolase	72.5638	TK	glycosomal protein	2924907
Tb927.8.6390	2	Yes	Lysophospholipase, putative	30.0735	TbLysoPLA	Glycosomal	24792668
Tb927.8.6660	3	Yes	Uncharacterized protein	69.0119	PFC1	PFR	19074134	Paraflagellar rod component, putative (PFC1)
Tb927.8.7020	9	Yes	Peptidase, putative	118.784	peptidase	none
Tb927.8.810	1	Yes	Uncharacterized protein	37.4945	RSP9	none		Radial spoke protein RSP9, putative
Tb927.8.890	1	Yes	Small GTP-binding protein Rab1, putative	22.7004	Rab1A	endocytic, flagellar	24945722	Ras-related protein Rab1A (Rab1A)
Tb927.9.10310	5	Yes	Mitochondrial carrier protein, putative	34.2733	MCP11	cytoplasm	19463859
Tb927.9.10770	8	Yes	Polyadenylate-binding protein	62.1074	PABP2	none	23382864
Tb927.9.11270	7	Yes	T-complex protein 1, eta subunit, putative	61.4326	TCP1-eta	cytoplasm	26187993
Tb927.9.12510	5	Yes	ATP-dependent DEAD/H RNA helicase, putative	82.6903	DED1	cytoplasm	26784394
Tb927.9.12650	17	Yes	Ubiquitin-activating enzyme E1, putative	134.57	UBA2	none
Tb927.9.2390	3	Yes	Putative uncharacterized protein	22.2962	hypothetical protein	none		mitotubule-associated protein gb4, putative.
Tb927.9.2470	11	Yes	Putative uncharacterized protein	85.8608	NOP86	none		Nucleolar protein (NOP86)
Tb927.9.2520	9	Yes	Microtubule-associated protein Gb4, putative	927.802	Gb4	none
Tb927.9.4190	5	Yes	Fatty acyl CoA syntetase 1	78.9094	ACS1	glycosomal	24792668
Tb927.9.4210	10	Yes	Fatty acyl CoA synthetase 3	77.8049	ACS3	cytoplasm, flagellum	11685899, 20382188
Tb927.9.4680	11	Yes	Probable eukaryotic initiation factor 4A	45.3333	EIF4	none	26784394	ATP-dependent DEAD box helicase, putative Gene comments: eIF4A1.
Tb927.9.5730	2	Yes	Nucleosome assembly protein-like protein	47.5558	nucleosome assembly	cytoplasm
Tb927.9.7110	1	Yes	GRAM domain containing protein, putative	32.5523	GRAM	none	26784394
Tb927.9.7520	4	Yes	Putative uncharacterized protein	37.9925	hypothetical protein	none
Tb927.9.7550	3	Yes	Adenylosuccinate lyase	53.0863	ADSL	PFR	18242729
Tb927.9.7770	1	Yes	Spermidine synthase, putative	32.9053	SpSyn	cytoplasm, flagellum	17916066, 8633027
Tb927.9.8070	1	Yes	QM-like protein	24.7201	QM	none
Tb927.9.9290	7	Yes	Polyadenylate-binding protein	62.9891	PABP1	cytoplasm	23382864
Tb927.9.9660	1	Yes	Putative uncharacterized protein	38.2711	ATOM	mitochondrion	22000100	Archaic translocase outer mitochondrial membrane 40 (ATOM40)
Tb927.9.9820	1	Yes	Glyceraldehyde-3-phosphate dehydrogenase, putative	38.7779	GAPDH	proximal paraflagellar rod of flagellum
Tb11.02.5420	4	No	NADPH--cytochrome p450 reductase, putative	69.943	CPR	none
Tb927.1.3830	2	No	Glucose-6-phosphate isomerase	67.5727	PGI	glycosomal
Tb927.1.720	4	No	Phosphoglycerate kinase	55.7119	PGKA	glycosomal
Tb927.10.10390	4	No	Trypanothione reductase	53.1232	trypanothione reductase	glycosomal
Tb927.10.10980	17	No	Heat shock protein 83	80.7125	heat shock protein 90	cytoplasm
Tb927.10.11540	2	No	40S ribosomal protein S3, putative	24.2008	RPS3	none
Tb927.10.11930	1	No	NAD or NADP dependent oxidoreductase, putative	27.6284	beta-D-hydroxybutyrate dehydrogenase	none
Tb927.10.12840	1	No	Mitochondrial carrier protein, putative	33.1103	MCP12	cytoplasm, flagellum	19463859
Tb927.10.13500	5	No	Ribosomal protein	24.581	60S ribosomal protein L10a	none	24792668, 10567419
Tb927.10.1390	1	No	Hypoxanthine-guanine phosphoribosyltransferase, putative	26.3437	HGPRT	glycosome
Tb927.10.1470	1	No	Hypoxanthine-guanine phosphoribosyltransferase	23.3572	HGPRT	cytoplasm, flagellum	10567419
Tb927.10.1490	6	No	Putative uncharacterized protein	134.728	Temperature dependent	none	22278056
Tb927.10.1510	25	No	NOT1	258.965	NOT1	none	26187993	starvation stress granules
Tb927.10.1550	3	No	Proteasome regulatory non-ATP-ase subunit 5	54.8615	RPN5	nucleus	12213827
Tb927.10.16120	4	No	Inosine-5'-monophosphate dehydrogenase	48.4508	inosine-5'-monophosphate dehydrogenase	glycosomal	24792668, 18242729
Tb927.10.1630	2	No	atp-binding cassette sub-family e member 1	71.0334	ABCE1	cytoplasm		RL1 or ABCE1
Tb927.10.3840	2	No	60S ribosomal protein L18a	20.8911	60S ribosomal protein L18a	none
Tb927.10.3990	7	No	ATP-dependent DEAD-box RNA helicase, putative	46.4392	DHH1	P-bodies	20124414, 26784394
Tb927.10.4640	2	No	Eukaryotic translation initiation factor 3 subunit L	55.6139	EIF3L	nucleus	25539953, 26784394
Tb927.10.560	1	No	40S ribosomal proteins S11, putative	20.0747	40S ribosomal proteins S11	nucleus	26784394
Tb927.10.6050	30	No	Clathrin heavy chain	190.505	CHC	endocytic	26784394
Tb927.10.8270	3	No	Eukaryotic translation initiation factor 3 subunit 8, putative	84.2875	EIF3C-2	cytoplasm	25539953
Tb927.10.8530	4	No	Glucose transporter	56.889	THT2A	none	10468568
Tb927.10.8720	2	No	Putative uncharacterized protein	61.4627	CCR4-NOT transcription complex subunit 10	cytoplasm, flagellum	26784394
Tb927.10.9440	3	No	NADH dehydrogenase	54.3176	54 NDH2	none	12615338
Tb927.11.10240	2	No	ATP-dependent protease subunit HslV	22.6698	HsIV	mitochondrion	18421378
Tb927.11.10560	5	No	Putative uncharacterized protein	79.65	EIF4G4	cytoplasm	26187993, 26784394
Tb927.11.10790	3	No	40S ribosomal protein SA	27.5921	40S ribosomal protein SA	none	23451133
Tb927.11.11360	4	No	Guanine nucleotide-binding protein beta subunit-like protein	34.668	RACK1	cytoplasm	16469736
Tb927.11.11460	2	No	Putative uncharacterized protein	68.956	ATOM69	mitochondrion		Mitochondrial import receptor subunit ATOM69 (ATOM69)
Tb927.11.11690	4	No	Vacuolar ATP synthase subunit B, putative	55.5845	Vacuolar proton pump subunit B	acidocalcisome	26150481
Tb927.11.12530	2	No	Flagellum attachment zone protein 3	90.5987	FAZ3	FAZ	25736289
Tb927.11.13090	8	No	Elongation factor 1 gamma, putative	46.2742	elongation factor 1 gamma	none
Tb927.11.14000	2	No	RNA-binding protein	28.7585	NRBD1	none		NRBD1 (NRBD1)
Tb927.11.14330	6	No	Putative uncharacterized protein	176.719	HECT-domain	none		HECT-domain (ubiquitin-transferase), putative
Tb927.11.15480	1	No	heat shock protein Hsp20, putative	23.0707	heat shock protein Hsp20	none	10
Tb927.11.15910	2	No	iron superoxide dismutase	22.0339	iron superoxide dismutase	cytoplasm	16413404
Tb927.11.16550	2	No	Zinc finger protein, C3H1 type-like	56.4	ZC3H46	cytoplasm	20444260
Tb927.11.1890	1	No	Serine-threonine kinase receptor-associated protein, putative	36.0023	STRAP	acidocalcisome
Tb927.11.2050	2	No	60S acidic ribosomal subunit protein, putative	34.6056	60S acidic ribosomal protein P0	cytoplasm	23451133
Tb927.11.2470	3	No	Aminopeptidase, putative	60.5474	metallo-peptidase	none
Tb927.11.2690	4	No	Succinyl-CoA:3-ketoacid-coenzyme A transferase	53.0631	succinyl-coA	cytoplasm	15326192
Tb927.11.3240	5	No	T-complex protein 1, zeta subunit, putative	59.5422	TCP-1-zeta	none
Tb927.11.3490	5	No	Putative uncharacterized protein	87.7463	hypothetical protein	none	26784394
Tb927.11.5050	4	No	Fumarate hydratase class I, putative	61.3052	FHm	cytoplasm	17884972
Tb927.11.5300	4	No	Kinesin-like protein	62.4858	KIN13-3	none
Tb927.11.5450	5	No	Malic enzyme	63.0795	malic enzyme	none	16984
Tb927.11.550	2	No	Putative uncharacterized protein	31.2731	hypothetical protein SCD6.10	none	26784394
Tb927.11.6250	1	No	Putative uncharacterized protein	27.5829	hypothetical protein	none	19436713
Tb927.11.6300	1	No	40S ribosomal protein S5, putative	21.3725	40S ribosomal protein S5	none	26784394
Tb927.11.7020	1	No	Proteasome subunit alpha type	27.8482	PSA4	none
Tb927.11.7080	2	No	Acidocalcisomal pyrophosphatase	47.2661	acidocalcisomal pyrophosphatase	acidocalcisome	14615483
Tb927.11.7170	5	No	Seryl-tRNA synthetase, putative	53.8228	SerRS	cytoplasm	17040903
Tb927.11.7380	3	No	Glycerol-3-phosphate dehydrogenase	66.9492	glycerol-3-phosphate dehydrogenase	glycosome	16806528
Tb927.11.7460	16	No	luminal binding protein 1 (BiP), putative	71.3911	BiP	none
Tb927.11.7780	4	No	Putative uncharacterized protein	46.2078	ATOM46	mitochondrion		Mitochondrial import receptor subunit ATOM46
Tb927.11.9130	2	No	Replication factor A, 51kDa subunit, putative	52.2983	RPA1	none
Tb927.11.9730	2	No	60S ribosomal protein L34, putative	19.3241	60S ribosomal protein L34	none
Tb927.2.1080	7	No	Retrotransposon hot spot (RHS) protein, putative	76.5956	RHS5	none
Tb927.2.1170	5	No	Retrotransposon hot spot (RHS) protein, putative	76.5597	RHS5	none
Tb927.2.1680	2	No	Peptidyl-prolyl cis-trans isomerase	21.1515	eptidyl-prolyl cis-trans isomerase	none	21610103
Tb927.2.4590	2	No	Branched-chain amino acid aminotransferase, putative	40.4068	branched-chain amino acid aminotransferase	none
Tb927.2.4710	4	No	RNA-binding protein, putative	49.9524	TRRM1	nucleus	26784394
Tb927.3.1590	2	No	Uncharacterized protein	72.6325	MRB1590	none	26991453
Tb927.3.1840	1	No	3-oxo-5-alpha-steroid 4-dehydrogenase, putative	33.3334	3-oxo-5-alpha-steroid 4-dehydrogenase	glycosomal	24792668
Tb927.3.2900	4	No	Elongation initiation factor 2 alpha subunit, putative	46.7952	EIF2A	nucleus	26187993
Tb927.3.3320	6	No	60S ribosomal protein L13	25.412	60S ribosomal protein L1360S	none
Tb927.3.3460	3	No	Uncharacterized protein	53.1956	hypothetical protein	none	19122194
Tb927.4.1270	5	No	RuvB-like DNA helicase, putative	49.8744	ruvB-like DNA helicase	none
Tb927.4.1800	6	No	Ribosomal protein L3, mitochondrial, putative	48.6613	ribosomal protein L3	nucleus	18364347
Tb927.4.1860	1	No	Ribosomal protein S19, putative	18.8342	ribosomal protein S19	none
Tb927.4.2000	3	No	RuvB-like DNA helicase, putative	52.5771	RUVBL	none
Tb927.4.2110	1	No	Protein phosphatase 2C, putative	33.4353	protein phosphatase 2C	none
Tb927.4.5010	6	No	Calreticulin, putative	45.0144	calreticulin	none
Tb927.5.1520	2	No	ATP-dependent protease ATPase subunit HslU1	52.4979	HslU1	mitochondrion	18421378
Tb927.5.1610	2	No	60S ribosomal protein L13a, putative	25.6955	60S ribosomal protein L13a	none
Tb927.5.2080	3	No	Inosine-5'-monophosphate dehydrogenase	52.2055	GMPR	glycosomal	18242729
Tb927.5.2570	2	No	Translation initiation factor, putative	79.761	EIF3B	cytoplasm	25539953
Tb927.5.2940	2	No	Stress-induced protein sti1, putative	62.2879	stress-induced protein sti1	cytoplasm	24945722
Tb927.5.3120	1	No	Translation initiation factor, putative	34.9457	EIF2B	none
Tb927.5.3800	22	No	Glutamine hydrolysing (Not ammonia-dependent) carbomoyl phosphate synthase, putative	203.964	glutamine hydrolysing	cytoplasm	17826337
Tb927.5.3810	7	No	Orotidine-5-phosphate decarboxylase/orotate phosphoribosyltransferase, putative	49.9244	orotidine-5-phosphate decarboxylase/orotate phosphoribosyltransferase	none	16546274
Tb927.5.4380	4	No	Serine/threonine-protein phosphatase	71.3251	kinetoplastid-specific phospho-protein phosphatase	none
Tb927.6.1080	2	No	Hydroxyacylglutathione hydrolase, putative	32.4874	glxII	glycosomal
Tb927.6.1260	1	No	Proteasome subunit beta type	30.422	PSB1	none
Tb927.6.1570	1	No	2-hydroxy-3-oxopropionate reductase, putative	31.7324	2-hydroxy-3-oxopropionate reductase	none
Tb927.6.2420	1	No	P22 protein	25.3336	p22 protein precursor	none
Tb927.6.4090	2	No	Chaperonin Hsp60, mitochondrial, putative	58.334	HSP60	none
Tb927.6.4670	2	No	Uncharacterized protein	40.6607	MORN1	flagellar pocket	22327007, 26540076
Tb927.6.4770	2	No	Uncharacterized protein	83.2538	MKT1	cytoplasm	26784394
Tb927.6.640	2	No	Serine/threonine protein phosphatase, putative	79.0572	kinetoplastid-specific phospho-protein phosphatase	cell tip	28628654
Tb927.7.1730	3	No	60S ribosomal protein L7, putative	27.696	60S ribosomal protein L7	cytoplasm	26784394
Tb927.7.210	5	No	Proline oxidase, putative	63.8181	PRODH	mitochondrion	none
Tb927.7.2190	1	No	Uncharacterized protein	29.224	TRAP	none
Tb927.7.2240	5	No	Uncharacterized protein	59.6284	hypothetical protein	nucleus	26784394
Tb927.7.2550	2	No	Proteasome regulatory ATPase subunit 5	49.1195	RPT5	none
Tb927.7.2570	2	No	Uncharacterized protein	52.5131	mitochondrial RNA binding protein 1	mitochondrion	26991453, 18951088
Tb927.7.3940	1	No	Mitochondrial carrier protein, putative	36.3178	MCP16	mitochondrion	19463859
Tb927.7.4180	1	No	Elongation of fatty acids protein	33.8486	fatty acid elongase	cytoplasm	16923389
Tb927.7.4270	3	No	Uncharacterized protein	25.2251	hypothetical protein	none
Tb927.7.4290	2	No	Uncharacterized protein	33.682	N-terminal conserved domain of Nudc./CS domain containing protein	none	10
Tb927.7.4420	2	No	Proteasome subunit alpha type	32.1341	proteasome alpha 3 subunit	none
Tb927.7.4500	2	No	Uncharacterized protein	58.3921	PX domain containing protein	none	22278056
Tb927.7.4900	14	No	5'-3' exonuclease XRNA, putative	158.571	XRNA	none	26784394
Tb927.7.5170	3	No	60S ribosomal protein L23a	18.1592	60S ribosomal protein L25	none
Tb927.7.570	1	No	Prefoldin, putative	22.7396	prefoldin	none
Tb927.7.6090	6	No	Uncharacterized protein	88.1082	EIF3A	cytoplasm in Leishmania	25539953
Tb927.7.6360	1	No	Histone H2A	18.6553	HA2Z	nucleus	16303849
Tb927.7.7460	1	No	Uncharacterized protein	22.3439	hypothetical protein	none	26784394
Tb927.8.1510	2	No	ATP-dependent DEAD/H RNA helicase, putative	62.4008	DBP2B	nucleus	26784394
Tb927.8.1570	1	No	Uncharacterized protein	28.8071	UPF0172	ER	26150481
Tb927.8.1600	4	No	Lysine--tRNA ligase	66.7439	lysyl-tRNA synthetase	cytoplasm
Tb927.8.1610	3	No	Major surface protease gp63, putative	62.9337	MSP-B	pellicular membrane	20700444
Tb927.8.1960	3	No	Uncharacterized protein	48.3951	hypothetical protein	none	26784394
Tb927.8.2520	3	No	Acetyl-coenzyme A synthetase	74.6192	acetyl-CoA synthetase	cytoplasm	20382188
Tb927.8.3100	2	No	Coronin	57.2766	CRN12	none	20700444
Tb927.8.3750	6	No	Nucleolar protein, putative	54.3242	NOP56	nucleus
Tb927.8.4430	1	No	Nucleoside phosphorylase, putative	36.9015	uridine phosphorylase	none
Tb927.8.4770	1	No	Small GTP-binding protein Rab18	23.4528	TbRAB18	none
Tb927.8.6580	4	No	Succinate dehydrogenase flavoprotein, putative	66.8381	SDH1	cytoplasm	19122194
Tb927.8.6760	1	No	IgE-dependent histamine-releasing factor, putative	19.3384	IgE-dependent histamine-releasing factor	none
Tb927.8.7100	17	No	Acetyl-CoA carboxylase, putative	242.762	ACC	glycosome	21306439
Tb927.8.7980	4	No	Vacuolar-type proton translocating pyrophosphatase 1	85.948	VP2	acidocalcisome	10523660
Tb927.9.10100	13	No	Histone-lysine N-methyltransferase	160.55	hypothetical protein	none
Tb927.9.11600	3	No	Gim5B protein	25.9585	gim5B	none
Tb927.9.12590	18	No	Glycerol kinase, glycosomal	56.3895	glk1	none
Tb927.9.12730	2	No	Chaperone protein DNAJ, putative	48.5623	chaperone protein DnaJ	none
Tb927.9.13990	1	No	RNA-binding protein, putative	34.5968	DRBD2	cytoplasm	26784394
Tb927.9.15110	1	No	60S ribosomal protein L5, putative	34.6146	60S ribosomal protein L5	none	23451133
Tb927.9.2420	1	No	Putative uncharacterized protein	22.8101	hypothetical protein	none
Tb927.9.4200	8	No	Fatty acyl CoA synthetase 2	79.5364	ACS2	cytoplasm	11685899
Tb927.9.4310	1	No	Tricarboxylate carrier, putative	35.6024	tricarboxylate carrier	none
Tb927.9.5190	3	No	Proliferating cell nuclear antigen	32.2941	PCNA	none
Tb927.9.5210	3	No	Glutaminyl-tRNA synthetase, putative	73.2841	glutaminyl-tRNA synthetase	none	20700444
Tb927.9.5320	6	No	Nucleolar RNA binding protein, putative	54.9698	nucleolar RNA binding protein	nucleus	26784394
Tb927.9.5770	6	No	Tryparedoxin peroxidase	22.4101	TRYP1	none	11522350
Tb927.9.6290	8	No	Arginine kinase	40.1715	AK1	flagellar	23776565, 15023992
Tb927.9.7590	1	No	60S ribosomal protein L11, putative	22.3551	60S ribosomal protein L11	none
Tb927.9.8100	1	No	Nascent polypeptide associated complex subunit, putative	20.117	nascent polypeptide associated complex subunit	none
Tb927.9.9060o	1	No	p21 antigen protein, putative	21.0471	Lsm12 protein	none	26784394
Tb927.9.9550	1	No	Putative uncharacterized protein	20.6789	conserved protein	none	26784394

## Sheet: GO Terms
GO Term description	Term #	Number
Unknown	null	81
ATP binding	GO:0005524	54
ribosome	GO:0003735	25
protein binding	GO:0005515	20
GTP binding	GO:0005525	15
enzymatic activity	GO:0003824	14
chaperone/unfolded protein binding	GO:0051082	13
nucleic acid binding	GO:0003676	12
GTPase activity	GO:0003924	10
metal ion binding	GO:0046872	8
cytoplasm	GO:0005737	8
hydrolase activity	GO:0016787	7
oxidoreductase activity	GO:0016491	7						58	cytoplasm
RNA binding	GO:0003723	7						37	flagellum (including axoneme, PFR, basal body)
NAD binding	GO:0051287	6						7	Cytoskeletal
intracellular	GO:0005622	6						25	Glycosome
binding	GO:0005488	6						14	mitochondrion
threonine-type endopeptidase activity	GO:0004298	6						184	None
microtubule motor activity	GO:0003777	5						14	nucleus
translation elongation factor activity	GO:0003746	5						2	Cell tip
translation initiation activity	GO:0003743	5
flavin adenine dinucleotide binding	GO:0050660	4
ATPase activity	GO:0016887	4
posttranscriptional gene silencing	GO:0010608	4
calmodulin binding	GO:0005516	4
calcium ion binding	GO:0005509	4
protein kinase activity	GO:0004672	4
mRNA binding	GO:0003729	4
cilium	GO:0097014	3
proton-transporting ATP synthase activity	GO:0046933	3
L-malate dehydrogenase activity	GO:0030060	3
oxidoreductase activity	GO:0016620	3
membrane	GO:0016020	3
zinc binding activity	GO:0008270	3
microtubule binding	GO:0008017	3
translation	GO:0006412	3
ribosome	GO:0005840	3
aminopeptidase activity	GO:0004177	3
DNA binding	GO:0003677	3
aminoacyl-tRNA editing activity	GO:0002161	3
serine-type exopeptidase activity	GO:0070008	2
peroxiredoxin activity	GO:0051920	2
chromosome organization	GO:0051276	2
NADP binding	GO:0050661	2
intraciliary transport particle B	GO:0030992	2
intraciliary transport particle	GO:0030990	2
adenyl nucleotide binding	GO:0030554	2
pyridoxal phosphate binding	GO:0030170	2
glycosome	GO:0020015	2
protein domain specific binding	GO:0019904	2
isomerase activity	GO:0016853	2
oxidoreductase activity	GO:0016627	2
kinase activity	GO:0016301	2
integral component of membrane	GO:0016021	2
small GTPase mediated signal transduction	GO:0007264	2
intracellular protein transport	GO:0006886	2
proteolysis	GO:0006508	2
rRNA processing	GO:0006364	2
axoneme	GO:0005930	2
nucleus	GO:0005634	2
ubiquitin-protein transferase activity	GO:0004842	2
lysine-tRNA ligase activity	GO:0004824	2
malate dehydrogenase (decarboxylating) (NAD+) activity	GO:0004471	2
inorganic diphosphatase activity	GO:0004427	2
fumarate hydratase activity	GO:0004333	2
serine-type endopeptidase activity	GO:0004252	2
metalloendopeptidase activity	GO:0004222	2
calcium-dependent cysteine-type endopeptidase activity	GO:0004198	2
IMP dehydrogenase activity	GO:0003938	2
DNA helicase activity	GO:0003678	2
magnesium ion binding	GO:0000287	2
mitotic spindle microtubule	GO:1990498	1
cortical microtubule plus-end	GO:1903754	1
protein binding	GO:0091514	1
rolling circle DNA replication	GO:0070581	1
glycosylation	GO:0070085	1
peptidase activity, acting on L-amino acid peptides	GO:0070011	1
cilium movement involved in cell motility	GO:0060294	1
cilium-dependent cell motility	GO:0060285	1
transmembrane transport	GO:0055085	1
proteolysis involved in cellular protein catabolic process	GO:0051603	1
iron-sulfur cluster binding	GO:0051536	1
cell tip	GO:0051286	1
coenzyme binding	GO:0050662	1
pyruvate, phosphate dikinase activity	GO:0050242	1
cofactor binding	GO:0048037	1
protein heterodimerization activity	GO:0046982	1
proton-transporting ATPase activity, rotational mechanism	GO:0046961	1
cilium organization	GO:0044782	1
ribosome binding	GO:0043022	1
protein homodimerization activity	GO:0042803	1
regulation of cell proliferation	GO:0042127	1
intraciliary transport	GO:0042073	1
ciliary basal body	GO:0036064	1
intraciliary transport involved in cilium assembly	GO:0035735	1
microtubule plus-end	GO:0035371	1
phosphatidylinositol binding.	GO:0035091	1
mitochondrial DNA inheritance	GO:0033955	1
nuclear lumen	GO:0031981	1
motile cilium	GO:0031514	1
box C/D snoRNP complex	GO:0031428	1
translation initiation factor binding	GO:0031369	1
heat shock protein binding	GO:0031072	1
protein binding, bridging	GO:0030674	1
DNA polymerase processivity factor activity	GO:0030337	1
manganese ion binding	GO:0030145	1
substrate-specific transmembrane transporter activity	GO:0022891	1
transmembrane transporter activity	GO:0022857	1
heme binding	GO:0020037	1
rRNA binding	GO:0019843	1
dolichol biosynthetic process	GO:0019408	1
hydrolase activity, acting on acid anhydrides, catalyzing transmembrane movement of substances	GO:0016820	1
hydrolase activity	GO:0016810	1
phosphotransferase activity	GO:0016773	1
transferase activity, transferring phosphorus-containing groups	GO:0016772	1
transferase activity, transferring acyl groups	GO:0016746	1
oxidoreductase activity,	GO:0016705	1
amino acid binding	GO:0016597	1
AMP binding	GO:0016208	1
translation release factor activity, codon specific	GO:0016149	1
hexose transmembrane transporter activity	GO:0015149	1
disulfide oxidoreductase activity	GO:0015036	1
protein transport	GO:0015031	1
FMN binding	GO:0010181	1
hydrogen-translocating pyrophosphatase activity	GO:0009678	1
HslUV protease complex	GO:0009376	1
hexose transport	GO:0008645	1
small protein activating enzyme activity	GO:0008641	1
pyridoxal kinase activity	GO:0008478	1
CoA-transferase activity	GO:0008410	1
cation transmembrane transporter activity	GO:0008324	1
methyltransferase activity	GO:0008168	1
tRNA processing	GO:0008033	1
signal transduction	GO:0007165	1
cell adhesion	GO:0007155	1
chromosome segregation	GO:0007059	1
lipid metabolic process	GO:0006629	1
protein phosphorylation	GO:0006468	1
protein folding	GO:0006457	1
transcription initiation from RNA polymerase II promoter	GO:0006367	1
chromatin organization	GO:0006325	1
mitochondrial DNA replication	GO:0006264	1
DNA replication	GO:0006260	1
obsolete GTP catabolic process	GO:0006184	1
purine ribonucleoside salvage	GO:0006166	1
cilium	GO:0005929	1
cytosol	GO:0005829	1
endoplasmic reticulum membrane	GO:0005789	1
endoplasmic reticulum	GO:0005783	1
mitochondrial inner membrane	GO:0005743	1
mitochondrial outer membrane	GO:0005741	1
mitochondrion	GO:0005739	1
nucleolus	GO:0005730	1
nucleoplasm	GO:0005654	1
nuclear envelope	GO:0005635	1
iron ion binding	GO:0005506	1
transporter activity	GO:0005215	1
structural constituent of cell wall	GO:0005199	1
structural molecule activity	GO:0005198	1
threonine-tRNA ligase activity	GO:0004829	1
serine-tRNA ligase activity	GO:0004828	1
proline-tRNA ligase activity	GO:0004827	1
methionine-tRNA ligase activity	GO:0004825	1
leucine-tRNA ligase activity	GO:0004823	1
isoleucine-tRNA ligase activity	GO:0004822	1
glycine-tRNA ligase activity	GO:0004820	1
glutamine-tRNA ligase activity	GO:0004819	1
cysteine-tRNA ligase activity	GO:0004817	1
aspartate-tRNA ligase activity	GO:0004815	1
arginine-tRNA ligase activity	GO:0004814	1
triose-phosphate isomerase activity	GO:0004807	1
transketolase activity	GO:0004802	1
sedoheptulose-7-phosphate:D-glyceraldehyde-3-phosphate glyceronetransferase activity	GO:0004801	1
superoxide dismutase activity	GO:0004784	1
phosphopyruvate hydratase activity	GO:0004634	1
phosphoglycerate mutase activity	GO:0004619	1
phosphoglycerate kinase activity	GO:0004618	1
phosphogluconate dehydrogenase (decarboxylating) activity	GO:0004616	1
phosphoenolpyruvate carboxykinase (ATP) activity	GO:0004612	1
orotidine-5'-phosphate decarboxylase activity	GO:0004590	1
orotate phosphoribosyltransferase activity	GO:0004588	1
exonuclease activity	GO:0004527	1
hypoxanthine phosphoribosyltransferase activity	GO:0004422	1
hydroxymethylglutaryl-CoA synthase activity	GO:0004421	1
glycerol kinase activity	GO:0004370	1
glycerol-3-phosphate dehydrogenase [NAD+] activity	GO:0004367	1
glucose-6-phosphate isomerase activity	GO:0004347	1
metallocarboxypeptidase activity	GO:0004181	1
ATP-dependent peptidase activity	GO:0004176	1
endopeptidase activity	GO:0004175	1
dihydrolipoyl dehydrogenase activity	GO:0004148	1
branched-chain-amino-acid transaminase activity	GO:0004084	1
biotin-[acetyl-CoA-carboxylase] ligase activity	GO:0004077	1
biotin carboxylase activity	GO:0004075	1
aspartate carbamoyltransferase activity	GO:0004070	1
argininosuccinate synthase activity	GO:0004055	1
adenylosuccinate synthase activity	GO:0004019	1
N6-(1,2-dicarboxyethyl)AMP AMP-lyase (fumarate-forming) activity	GO:0004018	1
adenosylhomocysteinase activity	GO:0004013	1
acetyl-CoA carboxylase activity	GO:0003989	1
acetate-CoA ligase activity	GO:0003987	1
CTP synthase activity	GO:0003883	1
6-phosphofructokinase activity	GO:0003872	1
3-hydroxybutyrate dehydrogenase activity	GO:0003858	1
1-pyrroline-5-carboxylate dehydrogenase activity	GO:0003842	1
peptidyl-prolyl cis-trans isomerase activity	GO:0003755	1
regulation of cell growth	GO:0001558	1
organellar small ribosomal subunit	GO:0000314	1
mitotic cytokinesis	GO:0000281	1
